# Supplementary material
Source: publisher figshare collection journal article supplement (https://scielo.figshare.com/articles/dataset/_/5816037)
Supplement: Supplementary file 1 [file Table_1.xls]

## Sheet: Table_1
<b>Depth</b>	<b>Sample</b>	<b>DC (%)</b>
2 mm	G-DU	58.2
	G-Opt	47.6
	G-Valo	39.7
4 mm	G-DU	50.4
	G-Opt	44.6
	G-Valo	38.2
