# Supplementary material
Source: publisher figshare collection journal article supplement (https://scielo.figshare.com/articles/dataset/_/5816037)
Supplement: Supplementary file 2 [file Table_2.xls]

## Sheet: Table_2
<b>Sample code</b>	<b>Compression strength (MPa)</b>	<b>Elastic modulus (MPa)</b>		<b>Strain at break (%)</b>
		<strong>1<sup>st</sup> region</strong>	<strong>2<sup>nd</sup> region</strong>
G-DU	260 (±12.3)	818 (±110)	3533 (±168)	21.0 (±2.6)
G-Opt	274 (±18.4)	317 (±61)	1840 (±73)	39.8 (±3.4)
G-Valo	266 (±19.0)	255 (±62)	1635 (±171)	48.6 (±6.8)
