# Supplementary material
Source: publisher figshare collection journal article supplement (https://scielo.figshare.com/articles/dataset/_/5816037)
Supplement: Supplementary file 3 [file Table_3.xls]

## Sheet: Table_3
<b>Sample</b>	<b>FS (MPa)</b>	<b>p</b>
G-DU	111.54±6.94<a href="#TFN2">*</a>
G-Opt	118.86±8.26<a href="#TFN2">*</a>	0.08
G-Valo	91.53±16.85
